# Supplementary material for: Land-use change interacts with climate to determine elevational species redistribution
Source: PubMed Central journal article supplement (PMC5883048; doi:10.1038/s41467-018-03786-9), 2018-04-03
Supplement: 41467_2018_3786_MOESM3_ESM.pdf [file 41467_2018_3786_MOESM3_ESM.pdf]

## **Description of Additional Supplementary Files**

Supplementary Software. R script for running the analyses.

Supplementary Data 1. The data used for site-level analysis; available on Dryad [doi:10.5061/dryad.k8g2672].

Supplementary Data 2. The data used for species-level analysis; available on Dryad [doi:10.5061/dryad.k8g2672].
